# Supplementary material
Source: HighWire-hosted journal article supplement (https://jnis.bmj.com/highwire/filestream/167737/field_highwire_adjunct_files/0/neurintsurg-2021-017667supp001_data_supplement.pdf)
Supplement: neurintsurg-2021-017667supp001_data_supplement.pdf [file neurintsurg-2021-017667supp001_data_supplement.pdf]

## ONLINE SUPPLEMENT

**eFigure 1 Risk of bias of included trials**

**eFigure 2 Forest plot comparing EVT alone vs IVT before EVT for successful reperfusion (eTICI 2b50 or greater).**

eTICI: expanded Thrombolysis in Cerebral Infarction

EVT: endovascular thrombectomy, IVT: intravenous thrombolysis

**eFigure 3 Forest plot comparing EVT alone vs IVT before EVT for all-cause mortality.**

EVT: endovascular thrombectomy; IVT: intravenous thrombolysis

eFigure 1 Risk of bias of included trials

|                                        | Random sequence generation<br>(selection bias) | Allocation concealment<br>(selection bias) | Blinding of participants /<br>personnel<br>(performance bias) | Blinding of outcome<br>assessment<br>(detection bias) | Incomplete outcome data<br>(attrition bias) | Selective reporting<br>(reporting bias) |
|----------------------------------------|------------------------------------------------|--------------------------------------------|---------------------------------------------------------------|-------------------------------------------------------|---------------------------------------------|-----------------------------------------|
| Thrombectomy alone vs Bridging therapy |                                                |                                            |                                                               |                                                       |                                             |                                         |
| DIRECT-MT <sup>1</sup>                 | +                                              | +                                          | −                                                             | +                                                     | +                                           | +                                       |
| DEVT <sup>2</sup>                      | +                                              | +                                          | −                                                             | +                                                     | +                                           | +                                       |
| SKIP <sup>3</sup>                      | +                                              | +                                          | −                                                             | +                                                     | +                                           | +                                       |
| MR CLEAN -NO IV <sup>4</sup>           | +                                              | +                                          | −                                                             | +                                                     | +                                           | +                                       |

eFigure 2 Forest plot comparing EVT alone vs IVT before EVT for successful reperfusion (eTICI 2b50 or greater).

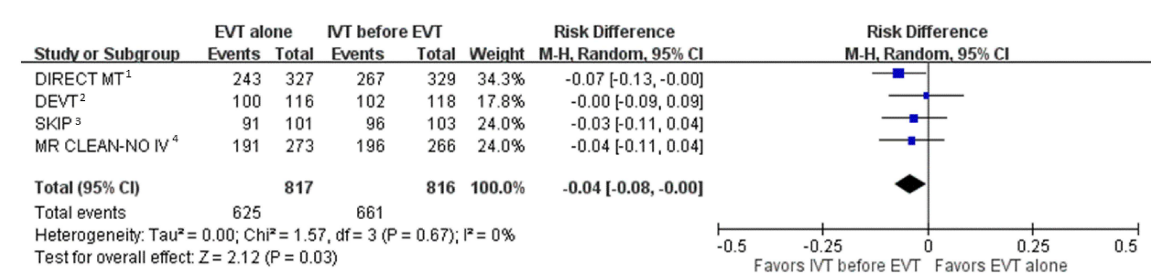

eFigure 3 Forest plot comparing EVT alone vs IVT before EVT for all-cause mortality

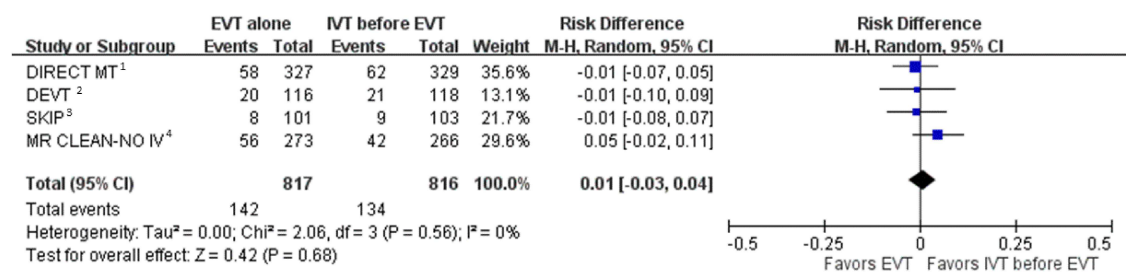

## References

1. Yang P, Zhang Y, Zhang L, Zhang Y, Treurniet KM, Chen W, et al. Endovascular thrombectomy with or without intravenous alteplase in acute stroke. *N Engl J Med*. 2020;382:1981-1993.
2. Zi W, Qiu Z, Li F, Sang H, Wu D, Luo W, et al. Effect of endovascular treatment alone vs intravenous alteplase plus endovascular treatment on functional independence in patients with acute ischemic stroke: The DEVT randomized clinical trial. *JAMA*. 2021;325:234-243.
3. Suzuki K, Matsumaru Y, Takeuchi M, Morimoto M, Kanazawa R, Takayama Y, et al. Effect of mechanical thrombectomy without vs with intravenous thrombolysis on functional outcome among patients with acute ischemic stroke: The SKIP randomized clinical trial. *JAMA*. 2021;325:244-253.
4. Roos Y, MR CLEAN-NO IV investigators. Direct endovascular treatment versus intravenous alteplase followed by endovascular treatment in acute stroke due to a large vessel occlusion. International Stroke Conference, March 18 2021.
